# Supplementary material for: Monitoring of gas composition in a laboratory biogas plant using cavity enhanced Raman spectroscopy
Source: Royal Society of Chemistry journal article supplement (doi:10.1039/c7an01689a), 2018-01-01
Supplement: c7an01689a1.pdf [file c7an01689a1.pdf]

Supplementary Information

Monitoring of Gas Composition in a Laboratory Biogas Plant using Cavity Enhanced Raman Spectroscopy

### Supplementary Information

### Monitoring of Gas Composition in a Laboratory Biogas Plant using Cavity Enhanced Raman Spectroscopy

Anne Sieburg<sup>1</sup>, Sebastian Schneider<sup>1</sup>, Di Yan<sup>1</sup>, Jürgen Popp<sup>1,2,3</sup>, Torsten Frosch<sup>1,2,3\*</sup>

<sup>1</sup> Leibniz Institute of Photonic Technology, 07745 Jena, Germany

<sup>2</sup> Friedrich Schiller University, Institute of Physical Chemistry, 07745 Jena, Germany

<sup>3</sup> Friedrich Schiller University, Abbe Center of Photonics, 07745 Jena, Germany

\* corresponding author: [torsten.frosch@uni-jena.de](mailto:torsten.frosch@uni-jena.de), [torsten.frosch@gmx.de](mailto:torsten.frosch@gmx.de)

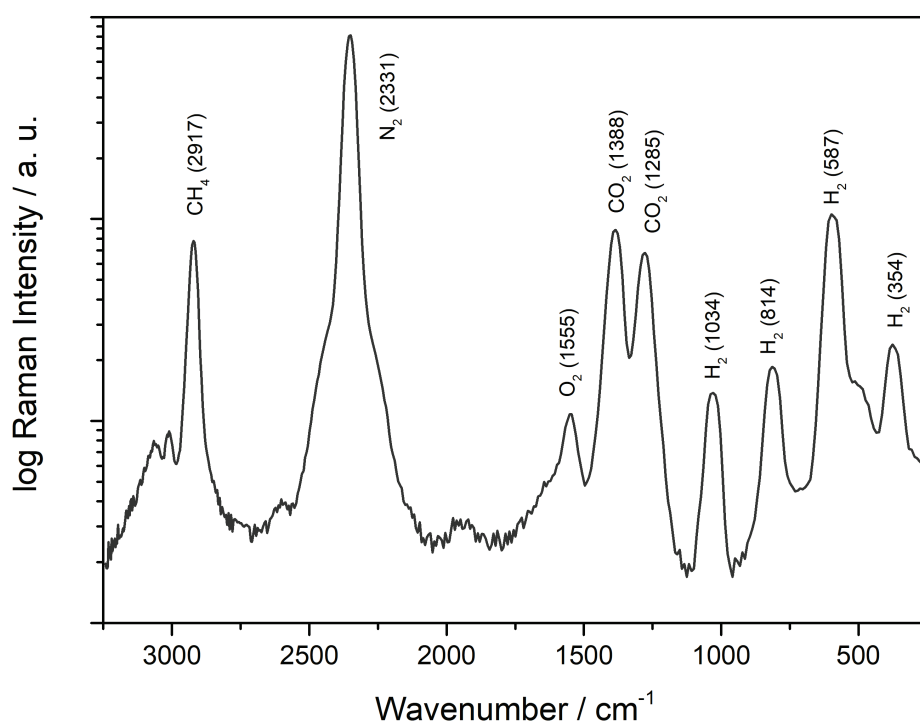

**Figure S1:** Raman spectrum of a biogas sample during the experiment when H<sub>2</sub> was added to enhance CH<sub>4</sub> production.

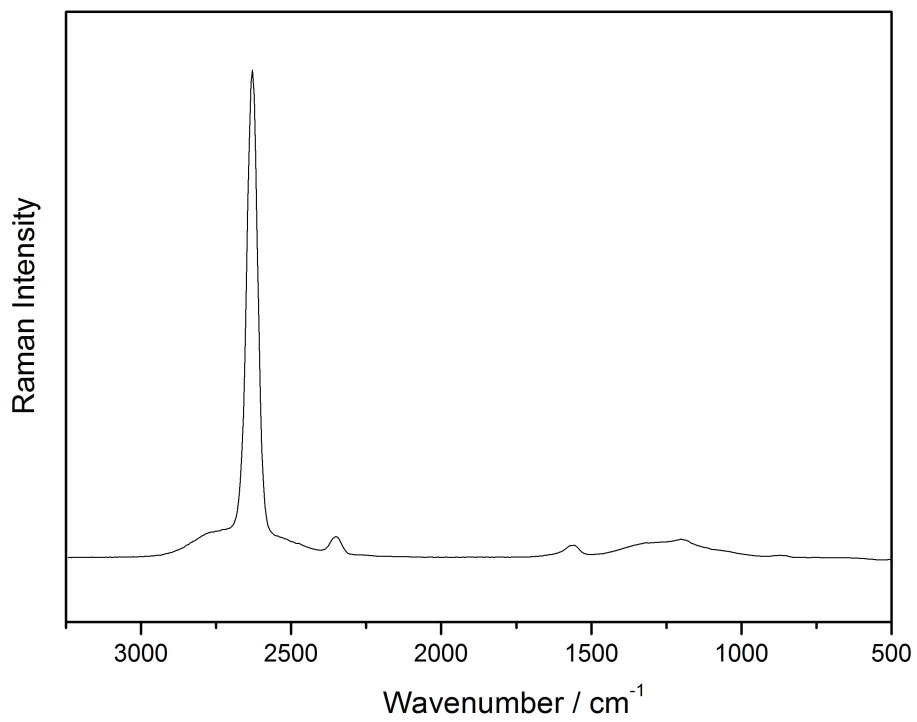

**Figure S2:** Raman spectrum of a H<sub>2</sub>S which is a component of biogas.
